# Supplementary material for: The role of composition in the atomic structure, oxygen loss, and capacity of layered Li–Mn–Ni oxide cathodes
Source: Royal Society of Chemistry journal article supplement (doi:10.1039/c3ta12440a), 2013-12-10
Supplement: c3ta12440a.pdf [file c3ta12440a.pdf]

Cite this: DOI: 10.1039/c0xx00000x

Full Article

www.rsc.org/xxxxxx

## Role of Composition on the Atomic Structure, Oxygen Loss, and Capacity of Layered Li–Mn–Ni Oxide Cathodes

Karalee A. Jarvis,<sup>a</sup> Chih-Chieh Wang,<sup>a</sup> Arumugam Manthiram,<sup>a</sup> and Paulo J. Ferreira<sup>\*a</sup>

Received (in XXX, XXX) Xth XXXXXXXXXX 20XX, Accepted Xth XXXXXXXXXX 20XX

DOI: 10.1039/b000000x

### Supporting Information

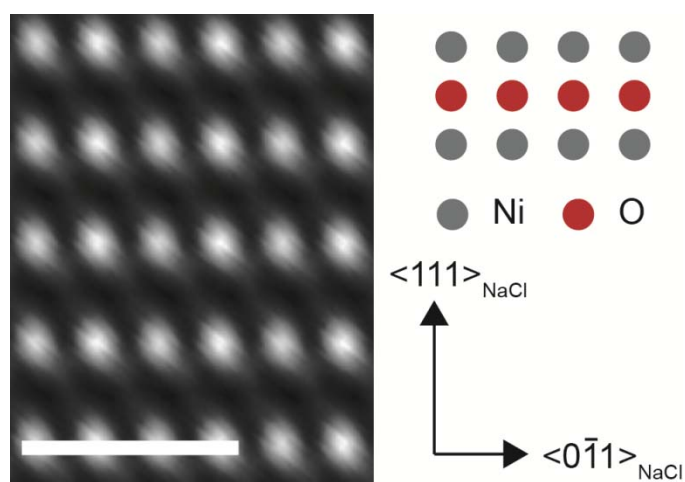

Fig. S1 Simulated HAADF-STEM image of NiO with the rock-salt structure, viewed down the  $\langle \bar{2}11 \rangle_{\text{NaCl}}$  zone axis. The scale bar is 0.5 nm.

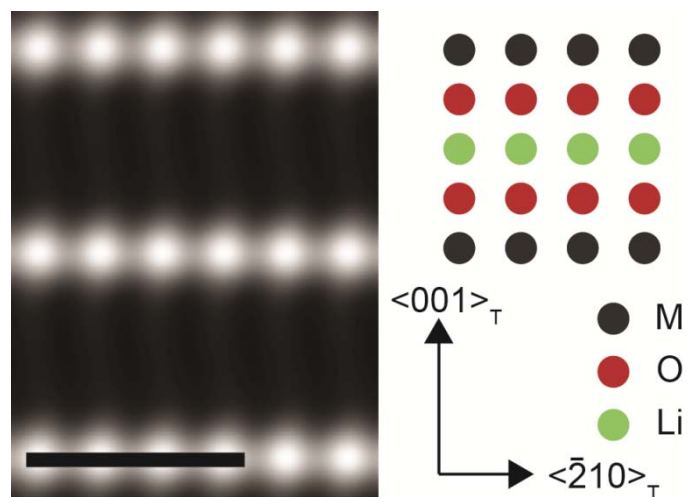

**Fig. S2** Simulated HAADF-STEM image of  $\text{Li}[\text{Mn}_{0.5}\text{Ni}_{0.5}]\text{O}_2$  viewed down the  $[120]_T$  zone axis. The scale bar is 0.5 nm.

Cite this: DOI: 10.1039/c0xx00000x

www.rsc.org/xxxxxx

ARTICLE TYPE

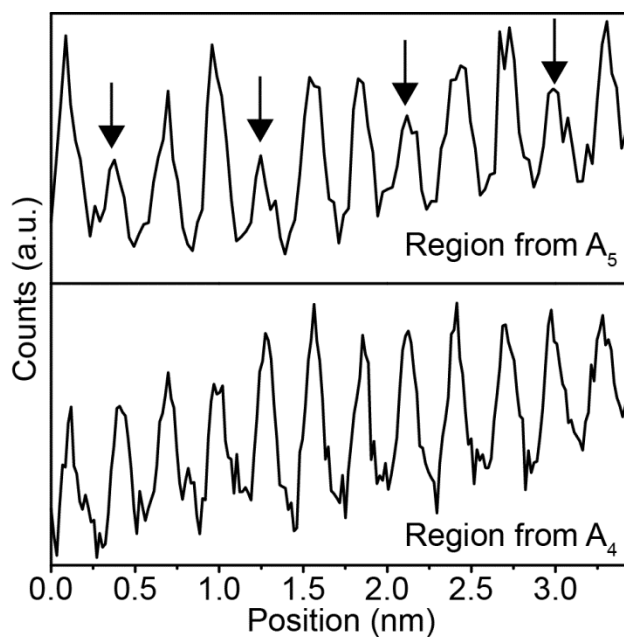

**Fig. S3** Intensity profiles along the  $[01\bar{1}]_{\text{NaCl}}$  direction from regions with an  $A_4$  atomic arrangement and an  $A_5$  atomic arrangement. The arrows show the position that exhibits reduced intensity, which occurs every third atomic column in  $A_5$ .

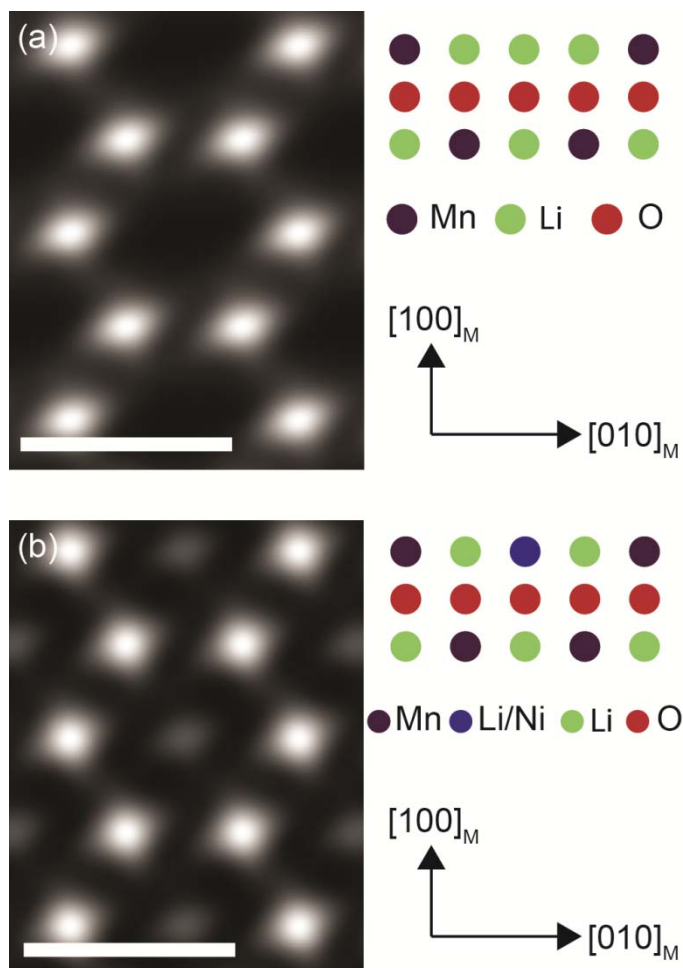

**Fig. S4** Simulated HAADF-STEM image of (a)  $\text{Li}_2\text{MnO}_3$  viewed down the  $[001]_M$  zone axis and (b)  $\text{Li}_{1.2}\text{Mn}_{0.6}\text{Ni}_{0.2}\text{O}_2$  viewed down the  $[001]_M$  zone axis. The scale bars are 0.5 nm.

Cite this: DOI: 10.1039/c0xx00000x

www.rsc.org/xxxxxx

ARTICLE TYPE

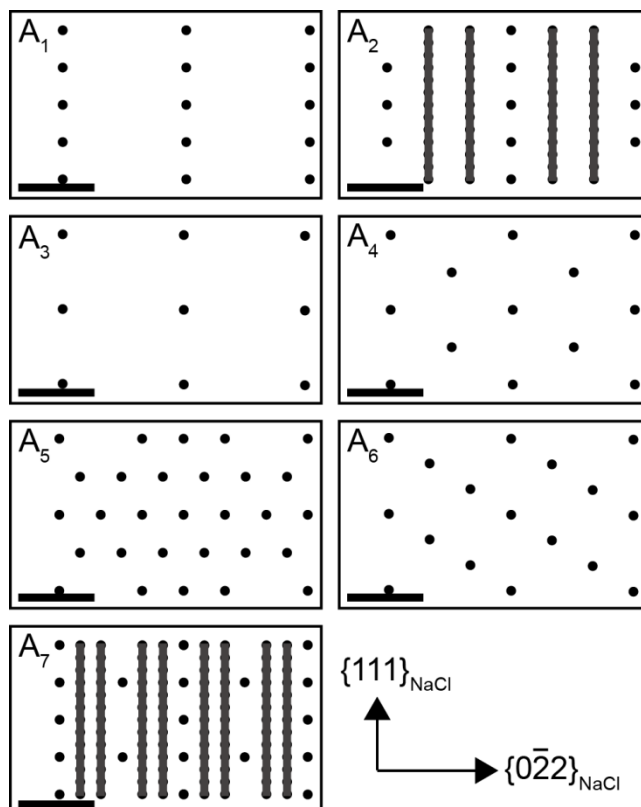

**Fig. S5** Simulated electron diffraction patterns corresponding to the seven types of arrangements  $A_1$  to  $A_7$  found for the  $\text{Li}[\text{Li}_{1/3-2x/3}\text{Mn}_{2/3-x/3}\text{Ni}_x]\text{O}_2$  series, viewed down the  $\langle \bar{2}11 \rangle_{\text{NaCl}}$  zone axis. The directions indicated assume the most basic structure for layered oxides, the NaCl structure. The simulations are meant to show the positions of the allowed reflections and not the intensity of each allowed reflection. Therefore, each spot is given the same size and intensity. The scale bars are all  $1 \text{ nm}^{-1}$ .

5

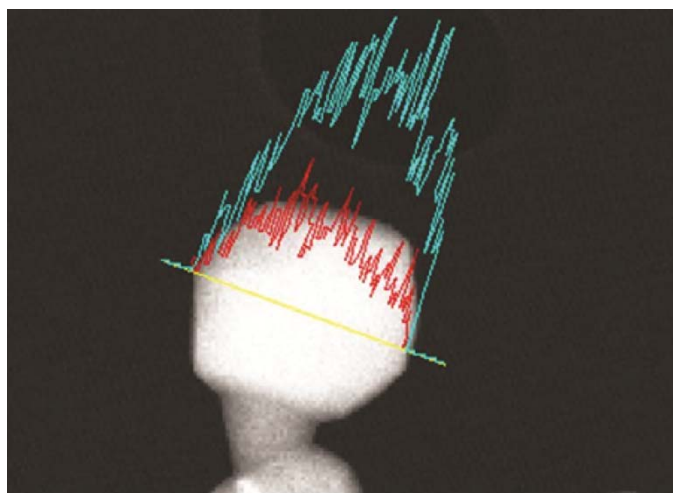

**Fig. S6** EDS line scan (yellow) across a particle of  $\text{Li}[\text{Li}_{0.2}\text{Mn}_{0.6}\text{Ni}_{0.2}]\text{O}_2$ , showing the distribution of Mn (blue) and Ni (red).

Cite this: DOI: 10.1039/c0xx00000x

www.rsc.org/xxxxxx

ARTICLE TYPE

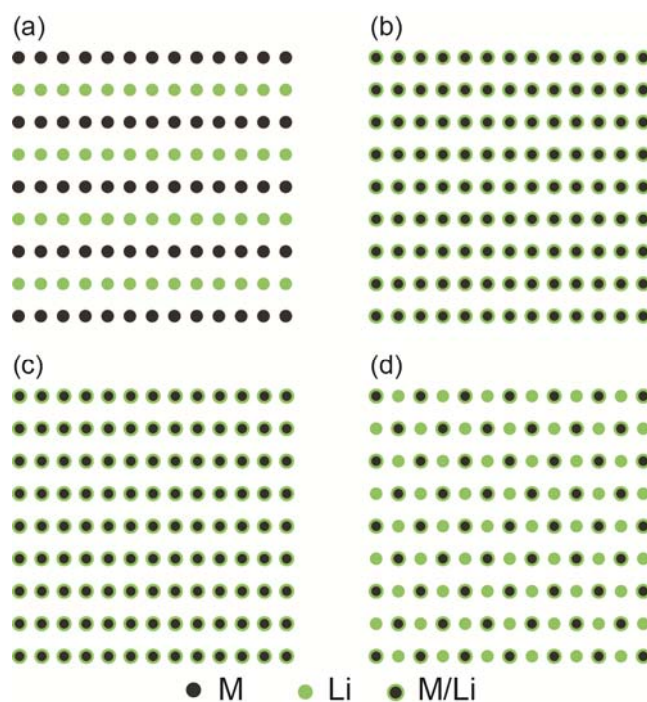

**Fig. S7** Two-dimensional atomic models of  $\text{LiMO}_2$ , viewed down the  $\text{NaCl} [\bar{2} 11]_{\text{NaCl}}$  zone axis with the M and Li layers alternating on the (a)  $(111)_{\text{NaCl}}$  (b)  $(11\bar{1})_{\text{NaCl}}$ , (c)  $(1\bar{1}1)_{\text{NaCl}}$ , and (d)  $(\bar{1}11)_{\text{NaCl}}$  planes.

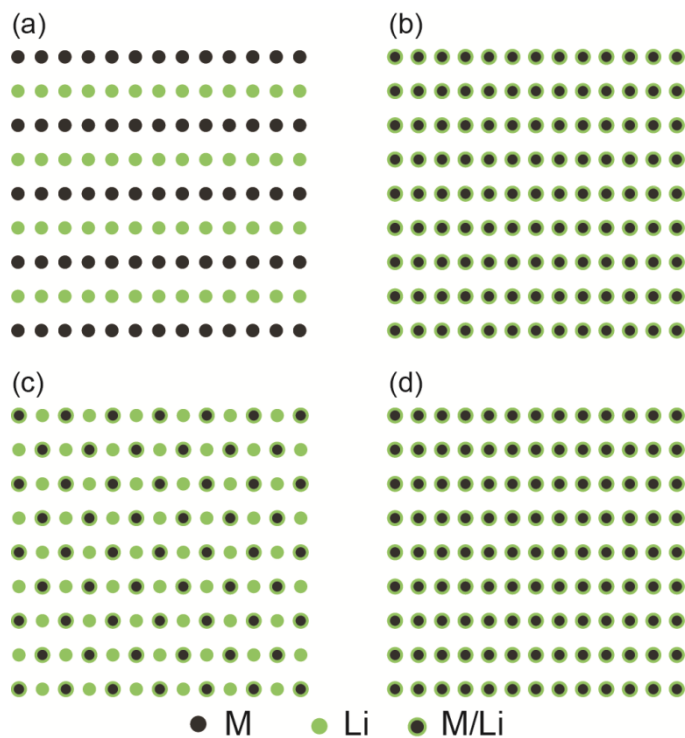

**Fig. S8** Two-dimensional atomic models of  $\text{LiMO}_2$ , viewed down the  $\text{NaCl} [1 \bar{2} 1]_{\text{NaCl}}$  zone axis with the M and Li layers alternating on the (a)  $(111)_{\text{NaCl}}$  (b)  $(11 \bar{1})_{\text{NaCl}}$ , (c)  $(1 \bar{1} 1)_{\text{NaCl}}$ , and (d)  $(\bar{1} 11)_{\text{NaCl}}$  planes.



Cite this: DOI: 10.1039/c0xx00000x

www.rsc.org/xxxxxx

ARTICLE TYPE

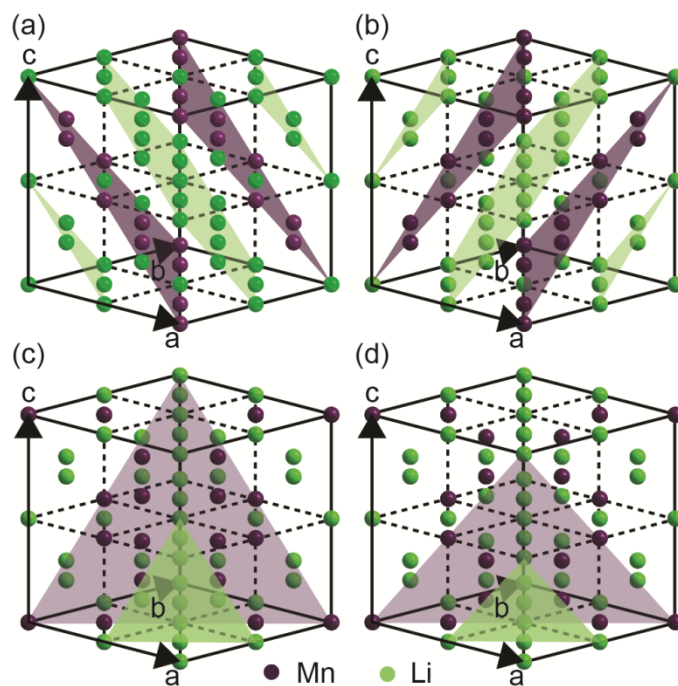

**Fig. S9** Three-dimensional atomic models of various NaCl  $\{111\}$  planes in which the M and Li layers reside in  $\text{Li}_2\text{MnO}_3$ . (a)  $(111)_{\text{NaCl}}$ , (b)  $(11\bar{1})_{\text{NaCl}}$ , (c)  $(\bar{1}\bar{1}1)_{\text{NaCl}}$ , and (d)  $(\bar{1}11)_{\text{NaCl}}$ .

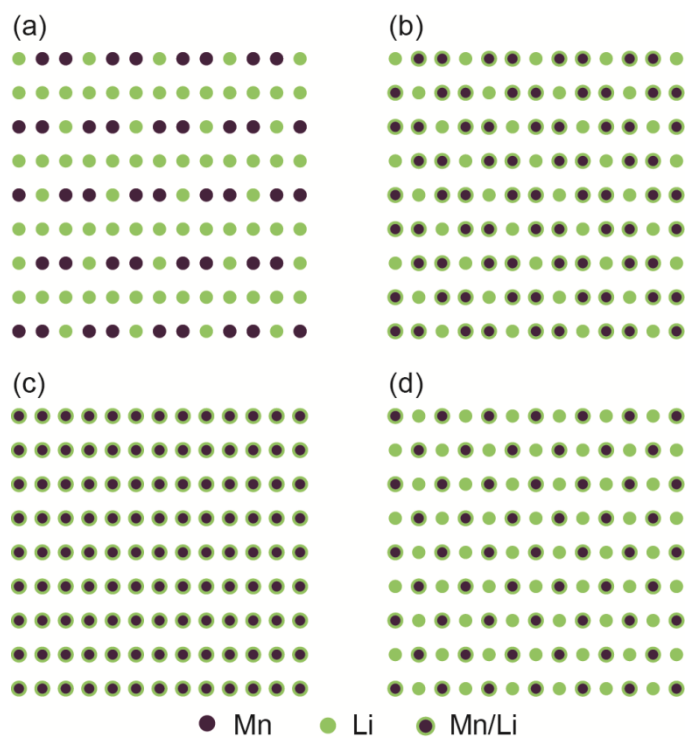

**Fig. S10** Two-dimensional atomic models of  $\text{Li}_2\text{MnO}_3$ , viewed down the  $\text{NaCl} [\bar{2} 11]_{\text{NaCl}}$  zone axis with the M and Li layers alternating on the (a)  $(111)_{\text{NaCl}}$  (b)  $(11\bar{1})_{\text{NaCl}}$ , (c)  $(1\bar{1}1)_{\text{NaCl}}$ , and (d)  $(\bar{1}11)_{\text{NaCl}}$  planes.

Cite this: DOI: 10.1039/c0xx00000x

www.rsc.org/xxxxxx

ARTICLE TYPE

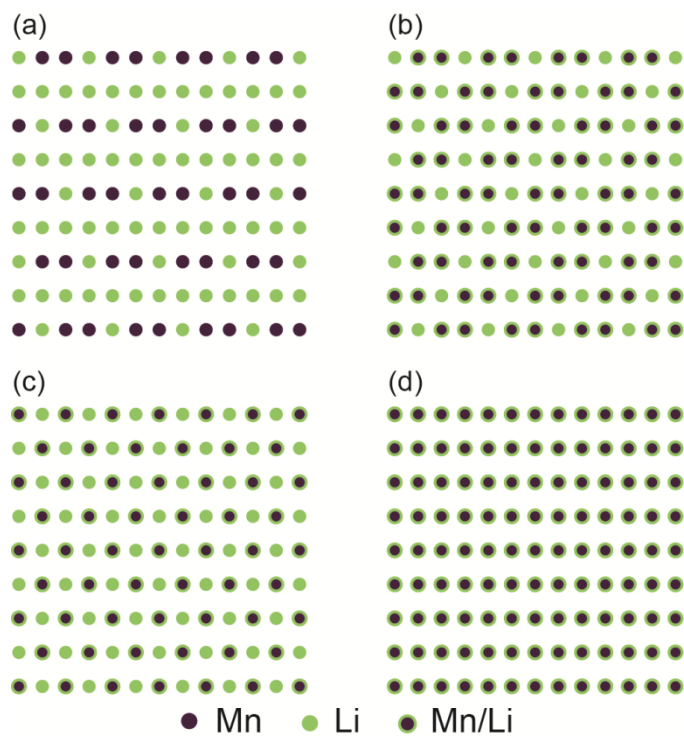

**Fig. S11** Two-dimensional atomic models of  $\text{Li}_2\text{MnO}_3$ , viewed down the  $\text{NaCl}$   $[1 \bar{2} 1]_{\text{NaCl}}$  zone axis with the M and Li layers alternating on the (a)  $(111)_{\text{NaCl}}$  (b)  $(11\bar{1})_{\text{NaCl}}$ , (c)  $(1\bar{1}1)_{\text{NaCl}}$ , and (d)  $(\bar{1}11)_{\text{NaCl}}$  planes

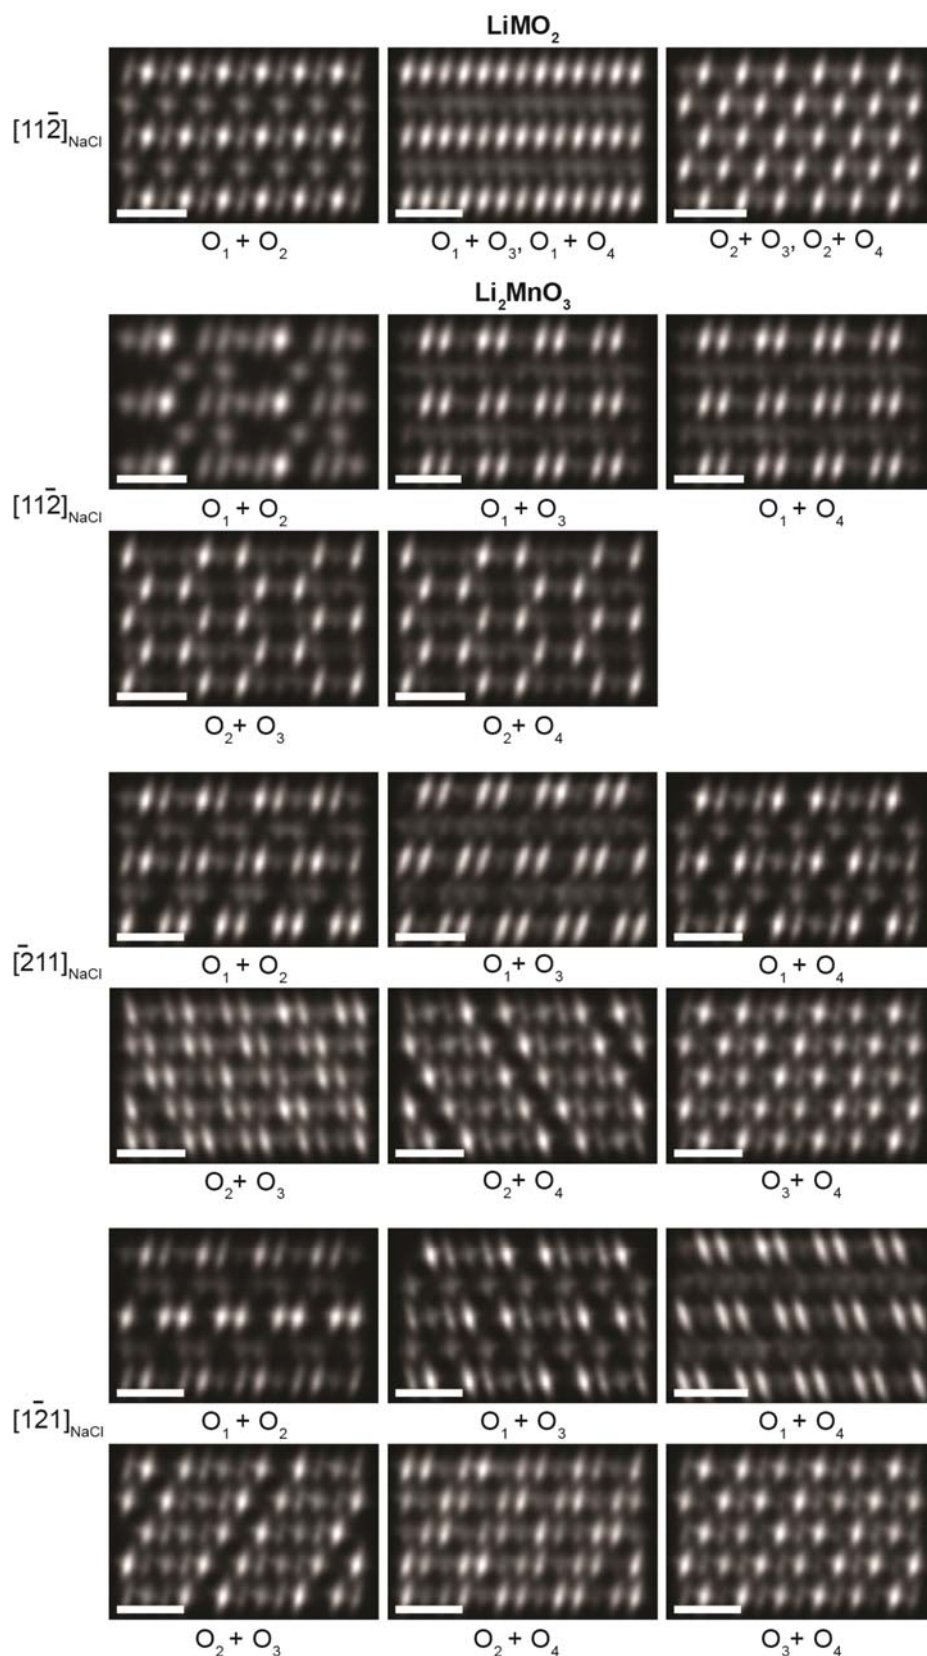

**Fig. S12** Simulated HAADF-STEM images of  $\text{LiMO}_2$  and  $\text{Li}_2\text{MnO}_3$  showing possible combinations of overlapping one set of  $\{111\}_{\text{NaCl}}$  type planes ordering across half of the crystal thickness and a different set of  $\{111\}_{\text{NaCl}}$  type planes ordering across the other half of the crystal thickness. The beam direction is shown on the left, while the combination of overlapping two different sets of  $\{111\}_{\text{NaCl}}$  types planes across the specimen thickness is, indicated by  $O_n + O_m$ . The scale bars are 0.5 nm.

Cite this: DOI: 10.1039/c0xx00000x

www.rsc.org/xxxxxx

ARTICLE TYPE

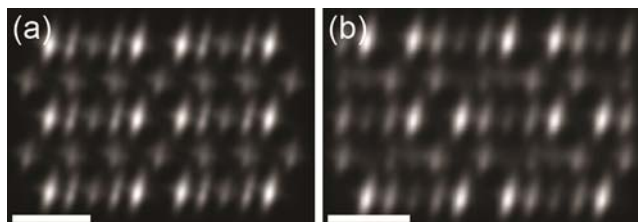

Fig. S13 Simulated HAADF-STEM image of  $\text{Li}_2\text{MnO}_3$  with (a) half of the crystal ordered on the  $(111)_{\text{NaCl}}$  planes with a  $[100]_{\text{M}}$  orientation variant and the other half ordered down the  $(\bar{1}\bar{1})_{\text{NaCl}}$  planes. The beam direction is  $[\bar{2}\bar{1}1]_{\text{NaCl}}$ . And, (b) a third of the cation layers ordered on the  $(111)_{\text{NaCl}}$  planes with a  $[110]_{\text{M}}$  orientation variant, a third ordered on the  $(\bar{1}\bar{1})_{\text{NaCl}}$  planes also with a  $[110]_{\text{M}}$  orientation variant and the last third ordered on the  $(11\bar{1})_{\text{NaCl}}$  planes with a  $[1\bar{1}0]_{\text{M}}$  orientation variant viewed in the  $\{\bar{2}\bar{1}1\}_{\text{NaCl}}$  direction. The scale bars are about 0.5 nm.

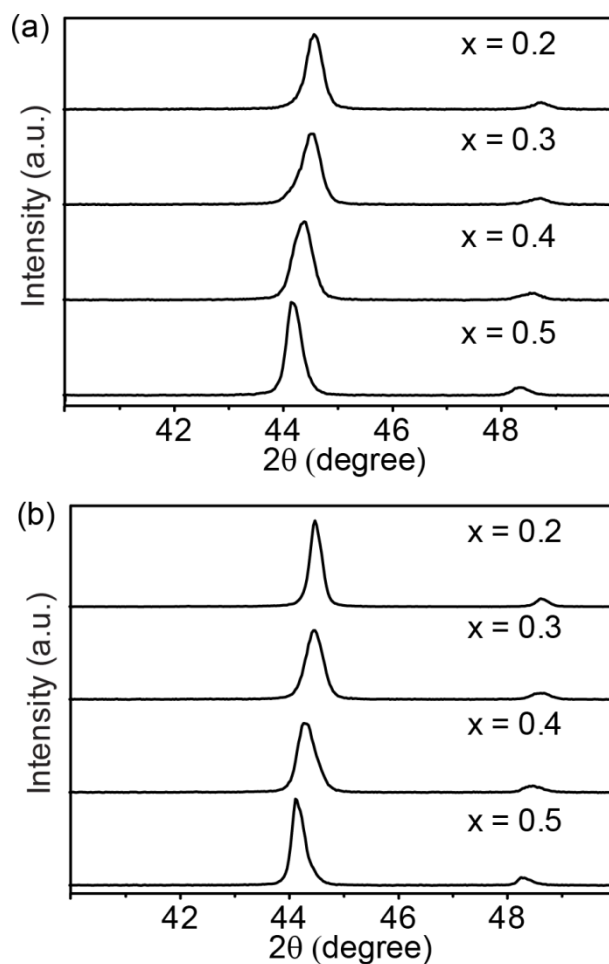

**Fig. S14** XRD patterns scanned  $40^\circ$  to  $50^\circ$  of four compositions for the  $\text{Li}[\text{Li}_{1/3-2x/3}\text{Mn}_{2/3-x/3}\text{Ni}_x]\text{O}_2$  ( $0 < x \leq 1/2$ ) series ( $x = 0.5, 0.4, 0.3$  and  $0.2$ ) prepared by (a) EDTA and (b) hydroxide precursor methods.

Cite this: DOI: 10.1039/c0xx00000x

www.rsc.org/xxxxxx

ARTICLE TYPE

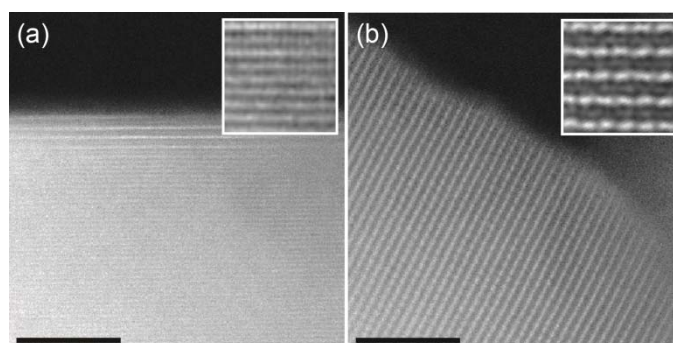

**Fig. S15** Aberration-corrected HAADF-STEM images of  $\text{LiMn}_{0.5}\text{Ni}_{0.5}\text{O}_2$  viewed down (a) the  $[\bar{2} 11]_{\text{NaCl}}$  zone axis and (b) the  $[\bar{1} 21]_{\text{NaCl}}$  zone axis. The scale bars are 5 nm. The insets show images at higher magnification and have been deconvoluted to reduce noise.<sup>51</sup>

5

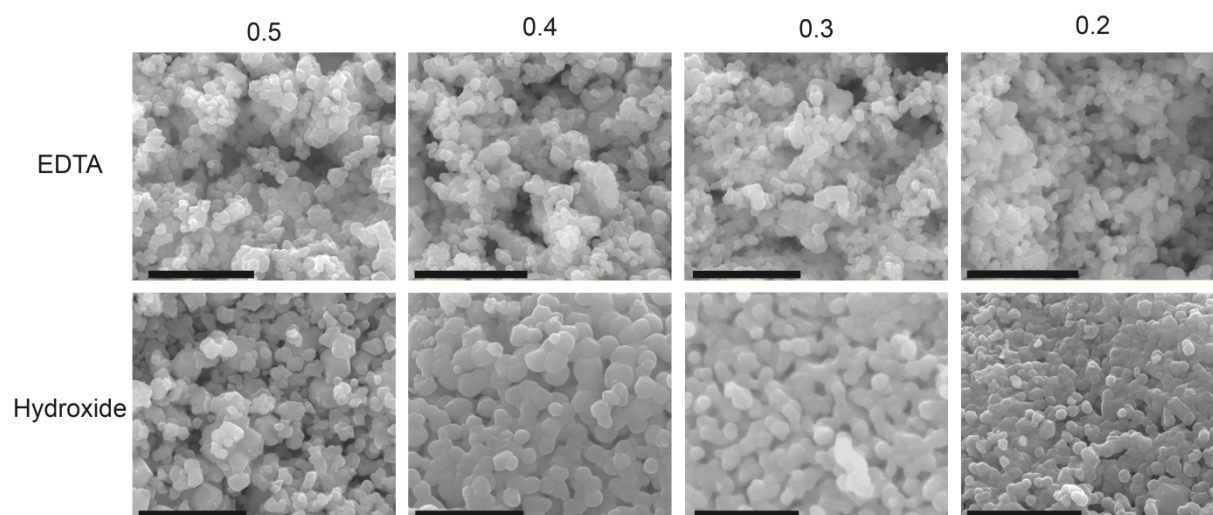

**Fig. S16** Secondary electron SEM images of four compositions for the  $\text{Li}[\text{Li}_{1/3-2x/3}\text{Mn}_{2/3-x/3}\text{Ni}_x]\text{O}_2$  ( $0 < x \leq 1/2$ ) series prepared by the EDTA and hydroxide methods. The scale bars are 2  $\mu\text{m}$ .



Cite this: DOI: 10.1039/c0xx00000x

Full Article

www.rsc.org/xxxxxx

**Table S1.** Equivalent directions for  $\text{LiMO}_2$  with ordering on the four  $\{111\}$  planes of NaCl

| Viewing direction (NaCl) | Plane of cation ordering in NaCl |                        |                        |                       |
|--------------------------|----------------------------------|------------------------|------------------------|-----------------------|
|                          | $111$                            | $11\bar{1}$            | $1\bar{1}1$            | $\bar{1}11$           |
| $11\bar{2}$              | $120$ ( $A_1$ ) <sup>a</sup>     | $12\bar{1}$ ( $A_4$ )  | $108\bar{1}$ ( $A_3$ ) | $2\bar{8}1$ ( $A_3$ ) |
| $\bar{2}11$              | $\bar{2}\bar{1}0$ ( $A_1$ )      | $8\bar{2}1$ ( $A_3$ )  | $8101$ ( $A_3$ )       | $211$ ( $A_4$ )       |
| $1\bar{2}1$              | $1\bar{1}0$ ( $A_1$ )            | $102\bar{1}$ ( $A_3$ ) | $\bar{1}11$ ( $A_4$ )  | $2101$ ( $A_3$ )      |

<sup>a</sup> The corresponding arrangements, as defined in the manuscript, are shown in parenthesis.

5

**Table S2.** Equivalent directions for  $\text{Li}_2\text{MnO}_3$  with ordering on the four  $\{111\}$  planes of NaCl

| Viewing direction (NaCl) | Plane of cation ordering in NaCl |                       |                       |                             |
|--------------------------|----------------------------------|-----------------------|-----------------------|-----------------------------|
|                          | $111$                            | $11\bar{1}$           | $1\bar{1}1$           | $\bar{1}11$                 |
| $11\bar{2}$              | $100$ ( $A_2$ ) <sup>a</sup>     | $001$ ( $A_5$ )       | $\bar{3}23$ ( $A_3$ ) | $\bar{3}\bar{2}3$ ( $A_3$ ) |
| $\bar{2}11$              | $110$ ( $A_2$ )                  | $0\bar{1}1$ ( $A_6$ ) | $6\bar{1}3$ ( $A_3$ ) | $3\bar{1}6$ ( $A_4$ )       |
| $1\bar{2}1$              | $1\bar{1}0$ ( $A_2$ )            | $011$ ( $A_6$ )       | $316$ ( $A_4$ )       | $613$ ( $A_3$ )             |

<sup>a</sup> The corresponding arrangements, as defined in the manuscript, are shown in parenthesis.

10

**Table S3** Observed lithium content of  $\text{Li}[\text{Li}_{1/3-2x/3}\text{Mn}_{2/3-x/3}\text{Ni}_x]\text{O}_2$  with  $x = 0.2, 0.3, 0.4,$  and  $0.5$

| $\text{Li}[\text{Li}_{1/3-2x/3}\text{Mn}_{2/3-x/3}\text{Ni}_x]\text{O}_2$ | Li content (observed) |       |
|---------------------------------------------------------------------------|-----------------------|-------|
|                                                                           | Co                    | SG    |
| $x = 0.2$ (Li 1.20)                                                       | 1.22                  | 1.182 |
| $x = 0.3$ (Li 1.13)                                                       | 1.11                  | 1.10  |
| $x = 0.4$ (Li 1.07)                                                       | 1.05                  | 1.03  |
| $x = 0.5$ (Li 1.00)                                                       | 1.00                  | 1.01  |

<sup>a</sup> Co: Co-precipitation method SG: Sol-gel method.
